# Supplementary material for: Assessment of extracellular polymeric substances production and antioxidant defences in periphytic communities exposed to effluent contaminants
Source: Royal Society of Chemistry journal article supplement (doi:10.1039/d4em00446a), 2024-01-01
Supplement: d4em00446a1.pdf [file d4em00446a1.pdf]

|                |       |        |        |                  |      |       |      |
|----------------|-------|--------|--------|------------------|------|-------|------|
| Amisulpride    | 16.04 | 16.42  | 69.25  | Metformin        | 297  | 3.18  | 11.9 |
| Amitriptyline  | bdl   | 1.70   | bdl    | Metoprolol       | bdl  | 1.70  | 6.95 |
| Amoxicillin    | bdl   | 28,527 | 29,268 | Omeprazole       | bdl  | 74.0  | Bdl  |
| Atenolol       | 49.4  | 59.0   | 90.4   | Pantoprazole     | bdl  | 10.8  | 1.62 |
| Atorvastatin   | 132   | bdl    | bdl    | Prilocaine       | 13.8 | 3.09  | 4.84 |
| Azithromycin   | Bdl   | bdl    | 33.9   | Propranolol      | bdl  | 10.81 | 9.67 |
| Bezafibrate    | 34.1  | 8.62   | 50.6   | Quetiapine       | 7.89 | bdl   | Bdl  |
| Bisoprolol     | 55.3  | 7.21   | 104    | Rosuvastatin     | 711  | bdl   | 20.4 |
| Bupropion      | Bdl   | bdl    | 8.07   | Sertraline       | bdl  | 4.96  | 7.07 |
| Caffeine       | 3681  | 74.0   | 76.5   | Sulfamethoxazole | 17.1 | 41.4  | 63.3 |
| Carbamazepine  | 154   | 274    | 317    | Telmisartan      | 671  | 575   | 629  |
| Cetirizine     | 96.8  | 159    | 420    | Timolol          | bdl  | bdl   | 12.7 |
| Citalopram     | 10.2  | 12.2   | bdl    | Tramadol         | 219  | 542   | 679. |
| Clarithromycin | Bdl   | 18.7   | bdl    | Trimethoprim     | 3.70 | 12.9  | 6.56 |
| Clindamycin    | Bdl   | 8.40   | bdl    | Valsartan        | 2251 | 198   | 1423 |
| DEET           | 113   | 32.9   | 116    | Venlafaxine      | 54.6 | 109   | 204  |
| Diclofenac     | 558   | 824    | 742    | BP1              | 3.36 | bdl   | 4.20 |
| Enalapril      | 9.22  | bdl    | bdl    | Caffeic acid     | 800  | 2.94  | 6.50 |
| Fluconazole    | 6.24  | 28.6   | 44.5   | Diclofenac       | 284  | 1128  | 782  |
| Gabapentin     | 197   | 84.3   | 174    | Furosemide       | 241  | 181   | 311  |
| Gliclazide     | 3.22  | 25.5   | 34.3   | Ibuprofen        | 35.6 | 18.3  | 47.3 |
| Indomethacin   | Bdl   | 24.7   | 26.8   | Naproxen         | 2.52 | 2.25  | 2.32 |
| Irbesartan     | 231   | 836    | 901    | Triclosan        | bdl  | 0.45  | 6.12 |
| Ketoprofen     | 21.7  | 30.7   | 24.4   |                  |      |       |      |
| Lamotrigine    | Bdl   | 57.9   | 194    |                  |      |       |      |
| Levofloxacin   | Bdl   | 2.43   | bdl    |                  |      |       |      |
| Lidocaine      | 3.22  | 47.0   | 45.5   |                  |      |       |      |

#### Elements ( $\mu\text{g L}^{-1}$ )

|    |       |      |      |    |        |        |       |
|----|-------|------|------|----|--------|--------|-------|
| Li | 5.59  | 6.45 | 13.4 | Ni | 5.47   | 10.4   | 9.47  |
| Na | 528   | 115  | 133  | Cu | 45.5   | 7.91   | 2.41  |
| Mg | 19.2  | 13.0 | 19.5 | Zn | 144    | 49.8   | 22.6  |
| Al | 510   | 35.1 | 15.5 | As | 1.32   | 1.46   | 0.60  |
| P  | 10760 | 6423 | 1581 | Rb | 37.9   | 22.1   | 18.77 |
| K  | 52.0  | 28.7 | 30.7 | Sr | 297.08 | 186.16 | 226.5 |
| Ca | 115   | 72.0 | 65.5 | Ag | 0.72   | 0.07   | 0.06  |
| V  | 1.81  | 0.54 | 1.40 | Cd | 0.20   | bql    | bql   |
| Cr | 3.92  | 5.87 | 0.63 | Sn | 2.63   | 0.47   | 0.39  |
| Mn | 193   | 31.3 | 67.7 | Sb | 0.60   | bql    | 0.37  |
| Fe | 1008  | 106  | 331  | Pb | 10.3   | 0.22   | 0.28  |
| Co | 1.63  | 1.49 | 1.07 | Ba | 52.4   | 40.6   | 7.27  |

#### Pesticides ( $\mu\text{g L}^{-1}$ )

|           |      |     |     |            |     |     |      |
|-----------|------|-----|-----|------------|-----|-----|------|
| 2,4-D     | 0.09 | bql | bql | Metribuzin | bdl | bdl | 0.12 |
| Triclopyr | 0.07 | bdl | bdl |            |     |     |      |

#### PAHs (ng/L)

|                    |     |     |      |                              |     |     |      |
|--------------------|-----|-----|------|------------------------------|-----|-----|------|
| Naphthalene (NP)   | bql | bql | 80.1 | Pyrene (PYR)                 | bql | bql | 40.7 |
| Phenanthrene (PHE) | bql | bql | 69.0 | Indeno(1,2,3 cd)pyrene (IND) | bql | bql | 41.0 |
| Fluoranthene (FLA) | bql | bql | 52.2 |                              |     |     |      |

**Table S2.** Average, with standard deviation within parenthesis (n = 3), activity of antioxidant enzymes and malondialdehyde concentration for LPO assessment, as found in periphytic communities sampled in three sites (Up, D1 and D2) in WWTPa, WWTPb and WWTPc.

|            | WWTPa             |                   |                    | WWTPb             |                   |                   | WWTPc             |                   |                    |
|------------|-------------------|-------------------|--------------------|-------------------|-------------------|-------------------|-------------------|-------------------|--------------------|
|            | Upa               | D1a               | D2a                | Upb               | D1b               | D2b               | Upc               | D1c               | D2c                |
| <b>LPO</b> | 0.06<br>(0.02)    | 0.07<br>(0.02)    | 0.06<br>(0.02)     | 0.11<br>(0.04)    | 0.13<br>(0.03)    | 0.07<br>(0.05)    | 0.17<br>(0.01)    | 0.12<br>(0.03)    | 0.10<br>(0.06)     |
| <b>CAT</b> | 325.74<br>(42.73) | 422.87<br>(41.39) | 601.98<br>(190.52) | 131.38<br>(28.14) | 247.79<br>(93.19) | 279.88<br>(66.56) | 188.31<br>(28.86) | 134.97<br>(18.80) | 391.38<br>(131.55) |
| <b>SOD</b> | 1.00<br>(0.05)    | 0.80<br>(0.08)    | 0.76<br>(0.13)     | 0.95<br>(0.08)    | 0.96<br>(0.09)    | 0.96<br>(0.17)    | 1.02<br>(0.08)    | 1.12<br>(0.08)    | 0.96<br>(0.14)     |
| <b>GPx</b> | 0.25<br>(0.13)    | 0.50<br>(0.17)    | 0.74<br>(0.07)     | 0.14<br>(0.03)    | 0.26<br>(0.04)    | 0.30<br>(0.03)    | 0.29<br>(0.02)    | 0.14<br>(0.03)    | 0.36<br>(0.10)     |
| <b>GST</b> | 0.08<br>(0.05)    | 0.04<br>(0.05)    | 0.09<br>(0.08)     | 0.03<br>(0.01)    | 0.10<br>(0.04)    | 0.34<br>(0.12)    | 0.18<br>(0.12)    | 0.08<br>(0.01)    | 0.16<br>(0.11)     |

**Section S3.** Brief description of the ecological quality status determination based on diatom communities in the three sites within each WWTP studied.

Each site within each case-study WWTP was sampled for benthic biofilms by scrubbing and washing five pebble-to-cobble (5-15 cm) sized stones selected to ensure coverage of the different microhabitats and shading conditions. A sub-sample was preserved with Lugol's iodine solution and then carefully transported in an ice cooler box to the laboratory. Upon arrival, samples were stored in a refrigerator shielded from light until they were ready for further processing. Samples were cleaned using a combination of nitric acid and potassium dichromate to eliminate organic matter. Subsequently, the samples underwent thorough washing with distilled water. A small droplet of the cleaned sample was placed on a cover slip and left to air-dry at room temperature. This prepared cover slip was then affixed to a glass slide using Naphrax® to create permanent slides. Taxonomic identification of diatoms to the species level (Table S2) was carried out using these permanent slides, under a light microscope (Leica model DM6 B) with Differential Interference Contrast (DIC) imaging. In each slide at least 400 valves were counted and identified using international floras (Krammer & Lange-Bertalot, 1986, 1988, 1991b, 1991a; Lange-Bertalot et al., 2017). For the determination of the ecological status by diatom communities in compliance with the WFD, the biotic index IPS (Indice de Polluosensibilité Spécifique; Cemagref, 1982) was calculated using the OMNIDIA software (version 5.3; Lecoite et al., 1993). Finally, the Ecological Quality Ratio (EQR) was calculated taking into account the reference benchmarks for the river typology of each sampled site according to A.P.A. (2021) and the summarized results are presented in the table below.

|                   | WWTPa |      |      | WWTPb |      |      | WWTPc |      |      |
|-------------------|-------|------|------|-------|------|------|-------|------|------|
|                   | Up    | D1   | D2   | Up    | D1   | D2   | Up    | D1   | D2   |
| EQR               | 0.99  | 1.02 | 0.93 | 0.86  | 0.78 | 0.86 | 0.15  | 0.12 | 0.35 |
| Ecological status | High  | High | Good | Good  | Good | Good | Bad   | Bad  | Poor |

## Literature

- APA. (2021). *Critérios para a Classificação das Massas de Água*.  
[https://www.apambiente.pt/sites/default/files/\\_Agua/DRH/ParticipacaoPublica/PGRH/2022-2027/3\\_Fase/PGRH\\_3\\_SistemasClassificacao.pdf](https://www.apambiente.pt/sites/default/files/_Agua/DRH/ParticipacaoPublica/PGRH/2022-2027/3_Fase/PGRH_3_SistemasClassificacao.pdf)
- Cemagref. (1982). *Étude des Méthodes Biologique d'Appreciation Quantitative de la Qualité des Eaux*.
- Krammer, K., & Lange-Bertalot, H. (1986). Sub wasserflora von Mitteleuropa. Bacillariophyceae 1. Teil. In *Sub wasserflora von Mitteleuropa* (p. 876).
- Krammer, K., & Lange-Bertalot, H. (1988). Bacillariophyceae 2. Teil: Bacilariaceae, Epithemiaceae, Surirellaceae. In *Susswasserflora von Mitteleuropa* (Vol. 2). G. Fischer.
- Krammer, K., & Lange-Bertalot, H. (1991a). Bacillariophyceae 3. Teil: Centrales, Fragilariaceae, Eunotiaceae. In *Süßwasserflora von Mitteleuropa: Vol. 2/3* (p. 576). Gustav Fischer Verlag.
- Krammer, K., & Lange-Bertalot, H. (1991b). Bacillariophyceae 4. Teil: Achnanthaceae, Kritische Ergänzungen zu Navicula (Lineolatae) und Gomphonema. In *Süßwasserflora von Mitteleuropa* (Vol. 2). Gustav Fischer.
- Lange-Bertalot, H., Hofmann, G., Werum, M., & Cantonati, M. (2017). *Freshwater Benthic Diatoms of Central Europe. Over 800 common species used in ecological assessment. English edition with updated taxonomy and added species*.
- Lecoq, C., Coste, M., & Prygiel, J. (1993). "Omnidia": software for taxonomy, calculation of diatom indices and inventories management BT - Twelfth International Diatom Symposium: Proceedings of the Twelfth International Diatom Symposium, Renesse, The Netherlands, 30 August – 5 September 1992. *Hydrobiologia*, 269/270, 509–513.
- Silva, C., Cachada, A., Gonçalves, F. J. M., Nannou, C., Lambropoulou, D., Patinha, C., Abrantes, N., & Pereira, J. L. (2022). Chemical characterization of riverine sediments affected by wastewater treatment plant effluent discharge. *Science of The Total Environment*, 839(February), 156305. <https://doi.org/10.1016/j.scitotenv.2022.156305>
